# Supplementary material
Source: PubMed Central journal article supplement (PMC5319478)

SUPPLEMENTARY DATA

**Supplementary Table S1.** Pearson's correlation coefficients relating markers of subclinical inflammation to relevant metabolic variables

|                                         | <b>Log CRP</b> | <b>GlycA</b> | <b>GlycB</b> |
|-----------------------------------------|----------------|--------------|--------------|
| GlycA                                   | 0.60 *         | --           | --           |
| GlycB                                   | 0.46 *         | 0.74 *       | --           |
| BMI                                     | 0.44 *         | 0.34 *       | 0.27 *       |
| Waist circumference                     | 0.36 *         | 0.28 *       | 0.22 *       |
| Total energy expenditure                | - 0.09 †       | - 0.08 †     | - 0.07 ‡     |
| Fasting glucose                         | 0.18 *         | 0.13 *       | 0.09 †       |
| 2h glucose                              | 0.29 *         | 0.22 *       | 0.16 *       |
| Log fasting insulin                     | 0.34 *         | 0.28 *       | 0.24 *       |
| Log HOMA-IR                             | 0.35 *         | 0.29 *       | 0.24 *       |
| Log S <sub>I</sub>                      | -0.41 *        | -0.33 *      | -0.29 *      |
| Log AIR                                 | 0.06 ‡         | 0.04         | 0.06 ‡       |
| Log AIR adjusted for log S <sub>I</sub> | 0.02           | -0.02        | 0.03         |

p <0.001; † p <0.01; ‡ p <0.05

SUPPLEMENTARY DATA

**Supplementary Figure S1. Unadjusted CRP levels and GlycA and GlycB NMR signals.**

Age 40s, 50s, and 60s indicate individuals aged 40 – 49, 50 – 59, and 60 – 69 years, respectively; AA, African-Americans, Hisp, Hispanics, and NHW, non-Hispanic whites; NGT, normal glucose tolerance; iIFG, isolated impaired fasting glucose; iIGT, isolated impaired glucose tolerance; IFG/IGT, impaired fasting glucose and impaired glucose tolerance; DM, type 2 diabetes mellitus.

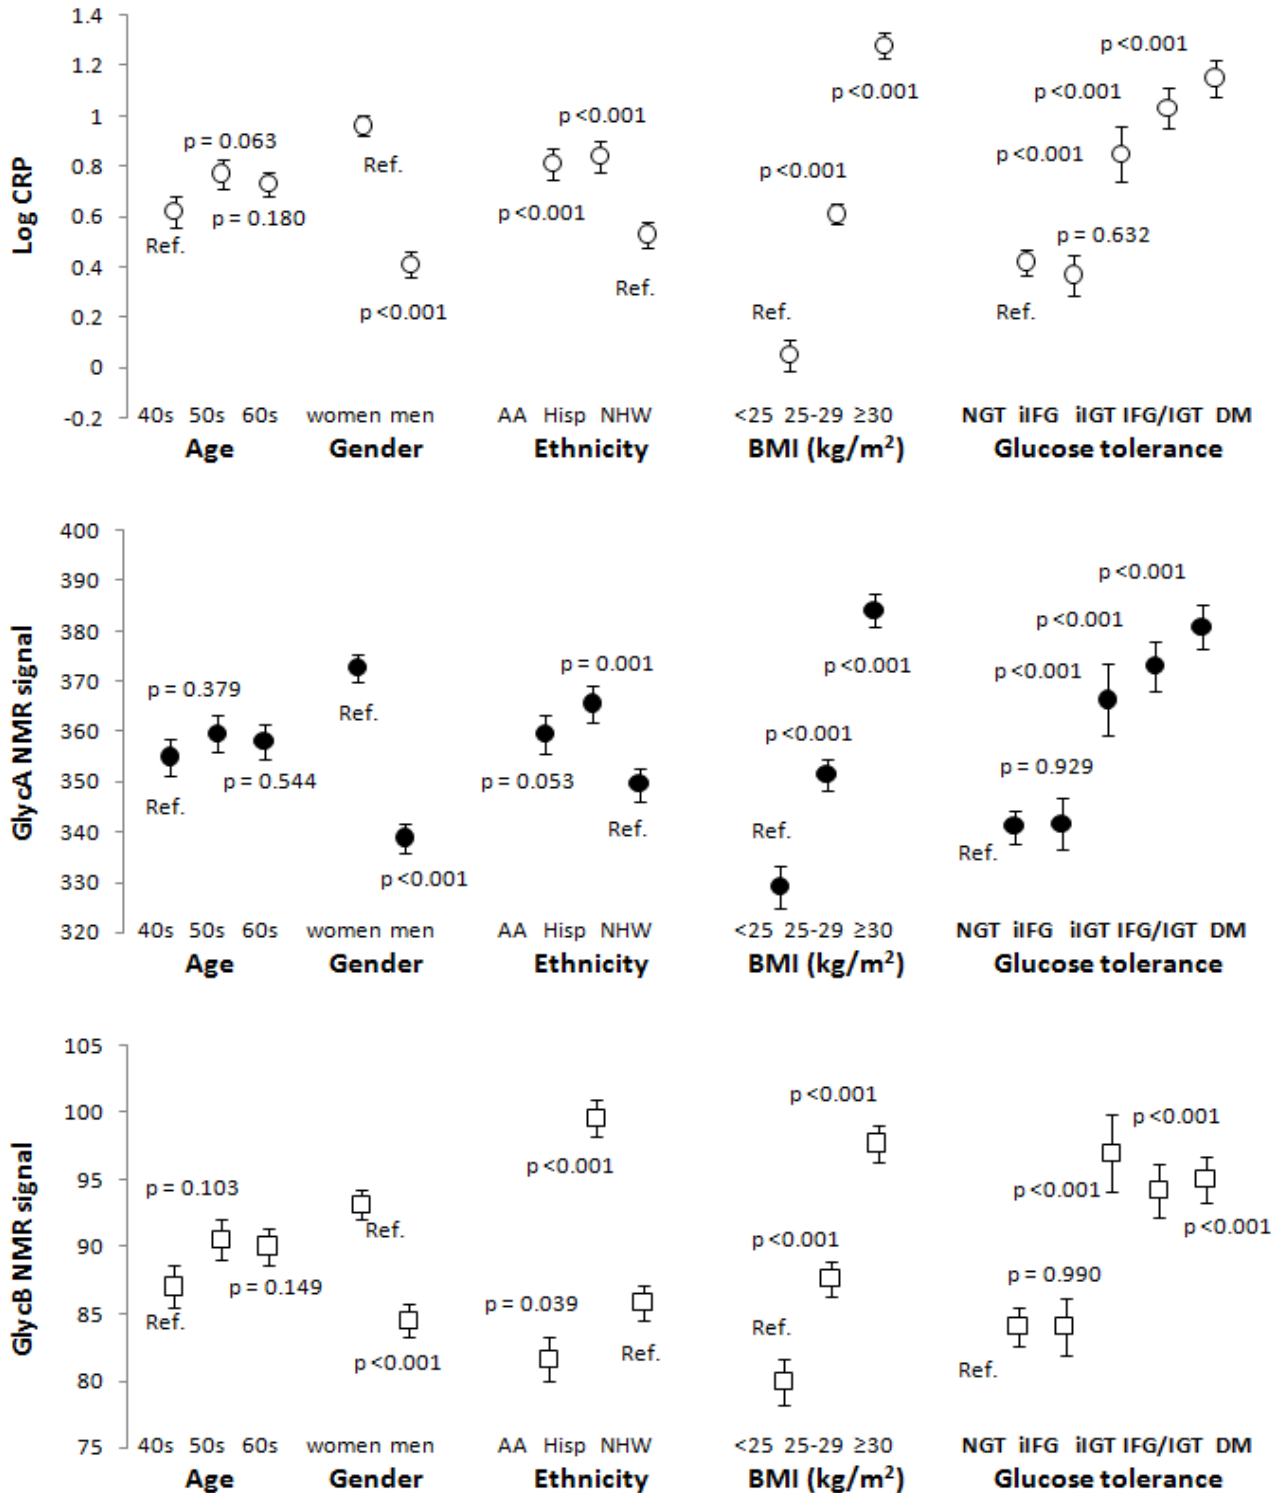

Supplement: DC161569SupplementaryData.pdf [file DC161569SupplementaryData.pdf]
